# Supplementary material for: Influence of Lenvatinib on the Functional Reprogramming of Peripheral Myeloid Cells in the Context of Non-Medullary Thyroid Carcinoma
Source: MDPI journal article supplement (doi:10.3390/pharmaceutics15020412), 2023-01-26
Supplement: s1 [file s1]

Article

# Supplementary Material: Influence of Lenvatinib on the Functional Reprogramming of Peripheral Myeloid Cells in the Context of Non-Medullary Thyroid Carcinoma

Chunying Peng , Katrin Rabold , Mihai G. Netea , Martin Jaeger and Romana T. Netea-Maier

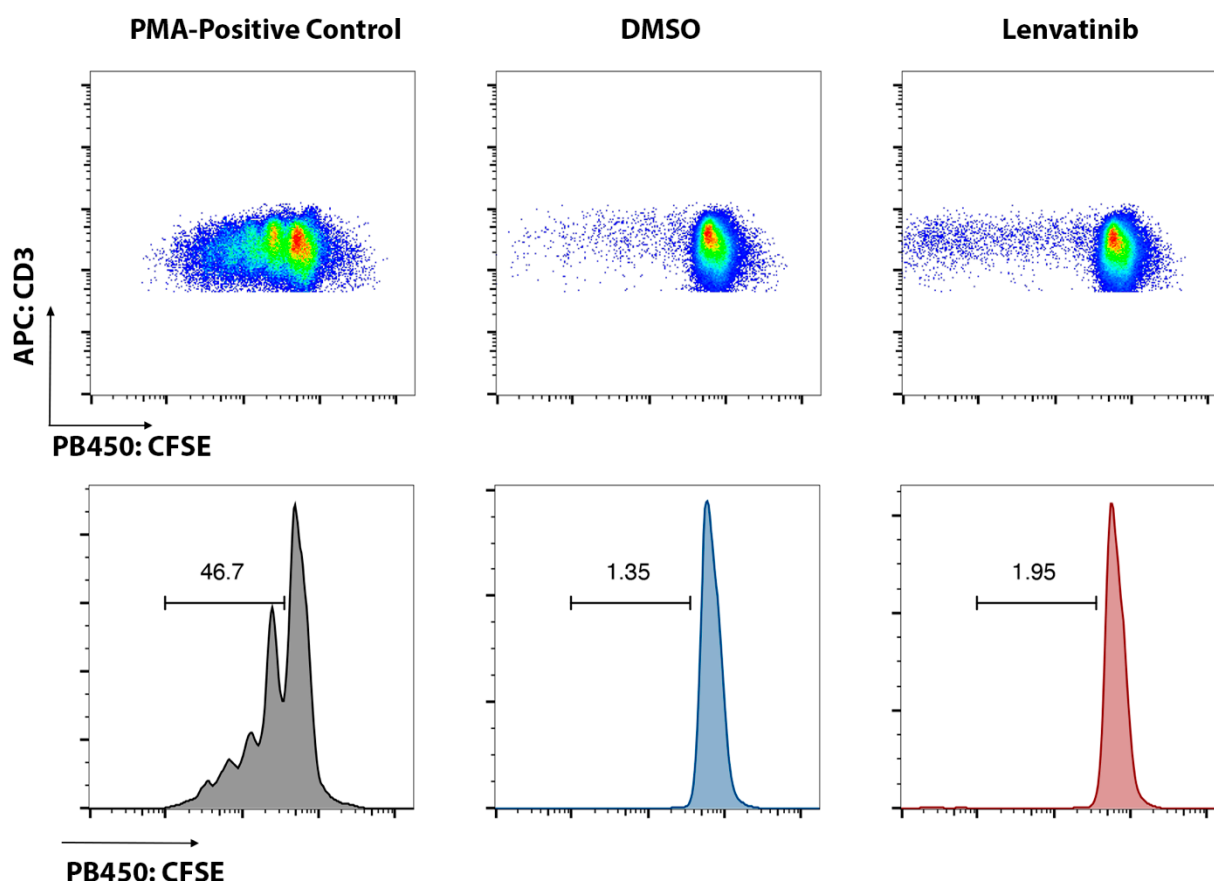

**Figure S1.** T cell proliferation in the presence of Lenvatinib. CFSE-labeled PBMCs were incubated with Lenvatinib (1 $\mu$ M) or DMSO control for 7 days. PMA-activated PBMCs were used as a positive control. Viable CD3<sup>+</sup> cells were gated for analysis. The upper and lower panel shows the dot plot and histogram from one representative donor. Numbers on histograms represent the percentage of proliferating T cells, n = 3. CFSE, carboxyfluorescein succinimidyl ester.

## Profiling of Lenvatinib in 4 cell line mix lysate using Kinobeads

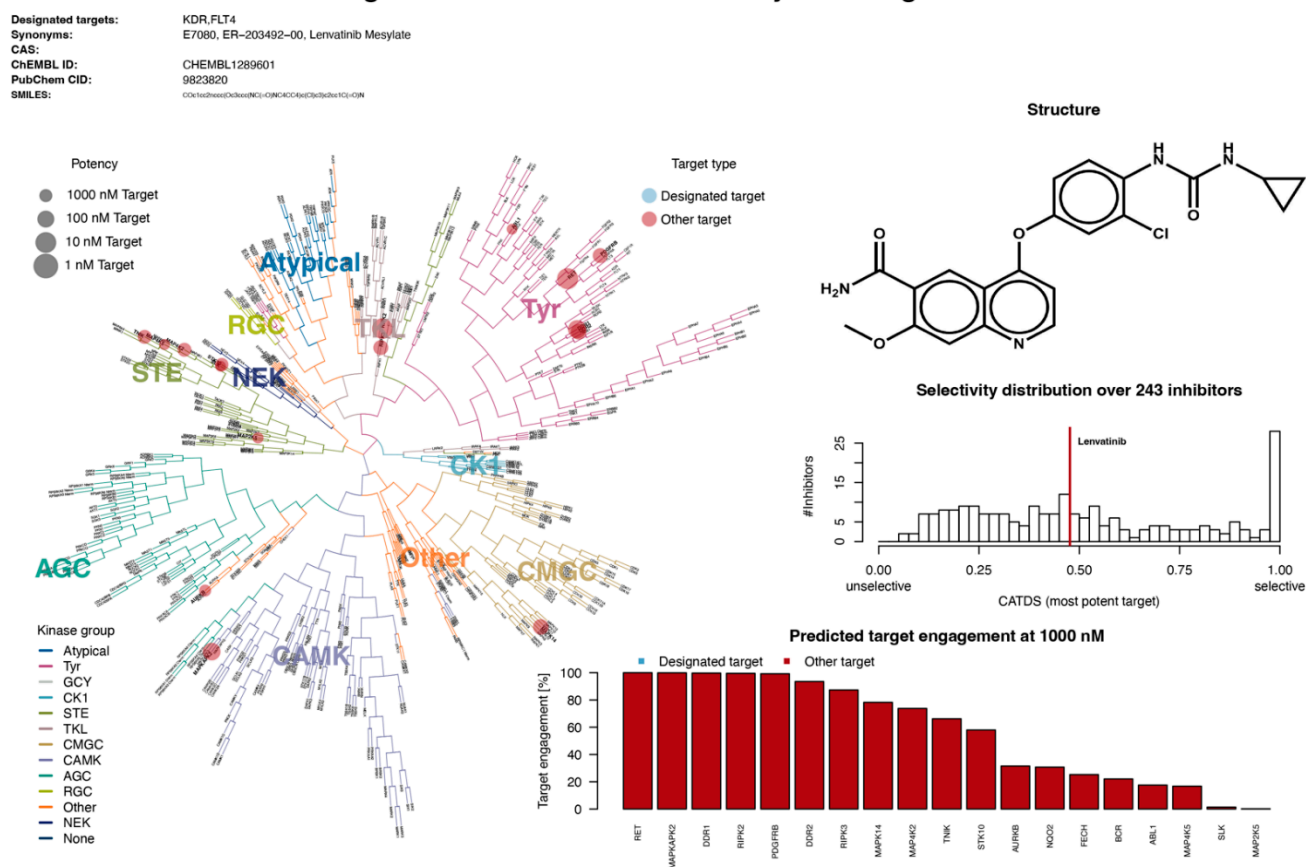

Source: Technical University Munich 2017

**Figure S2.** Target landscape of Lenvatinib in 4 cell lines. The figure was downloaded from the public database ProteomeXchange (<http://www.proteomexchange.org>). The upper-right figure shows the chemical structure of Lenvatinib. A phylogenetic tree of all kinases for the four cell lines (K-562, MV-4-11, SK-N-BE, COLO 205) is shown on the left side. The circle size indicates potency; the color code specifies kinase–drug interaction with Lenvatinib designated or other targets. The drug selectivity is shown as CATDS (concentration and target-dependent selectivity) value. The lower right figure shows the predicted target engagement of Lenvatinib at 1000nM.

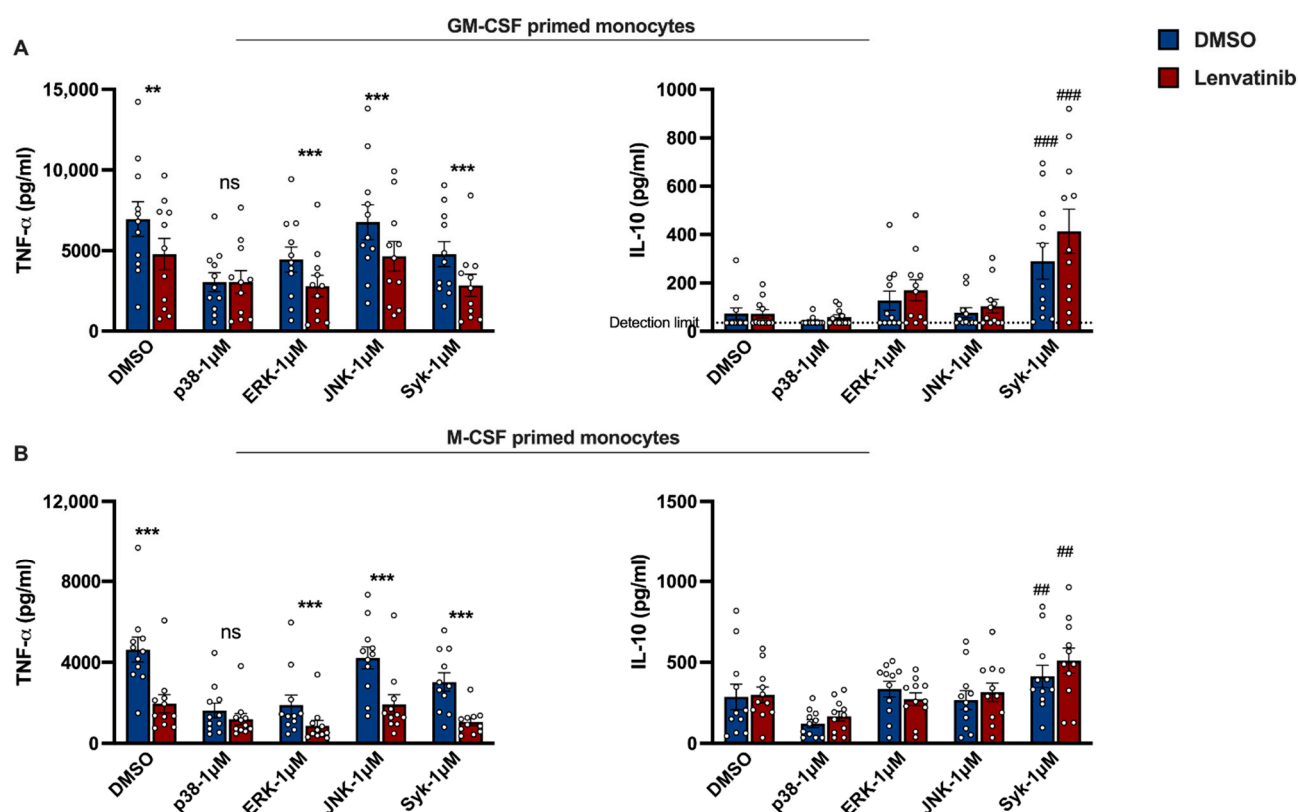

**Figure S3.** The impact of TLR4 downstream kinase inhibitors on Lenvatinib-mediated immunomodulation in GM-CSF/M-CSF-primed monocytes. Monocytes were primed with GM-CSF (10ng/ml) or M-CSF (50ng/ml) in the presence of kinase inhibitor with or without concomitant Lenvatinib treatment. After 24h of incubation, monocytes were stimulated with LPS and cytokine production was determined by ELISA. **(A)** Cytokine response of GM-CSF primed monocytes,  $n = 12$ . **(B)** Cytokine response of M-CSF primed monocytes,  $n = 12$ . The bar graphs indicate mean  $\pm$  SME; each dot represents one healthy donor. \*\*  $p < 0.01$ , \*\*\*  $p < 0.001$  when single kinase inhibitor was compared with kinase inhibitor plus Lenvatinib. ##  $p < 0.01$ , ###  $p < 0.001$  when kinase inhibitor was compared with DMSO by nonparametric Wilcoxon matched-pair test.
